# Supplementary material for: Lysyl oxidase family activity promotes resistance of pancreatic ductal adenocarcinoma to chemotherapy by limiting the intratumoral anticancer drug distribution
Source: PubMed Central journal article supplement (PMC5078000; doi:10.18632/oncotarget.8527), 2016-04-01
Supplement: oncotarget-07-32100-s001.pdf [file oncotarget-07-32100-s001.pdf]

## Lysyl oxidase family activity promotes resistance of pancreatic ductal adenocarcinoma to chemotherapy by limiting the intratumoral anticancer drug distribution

### Supplementary Materials

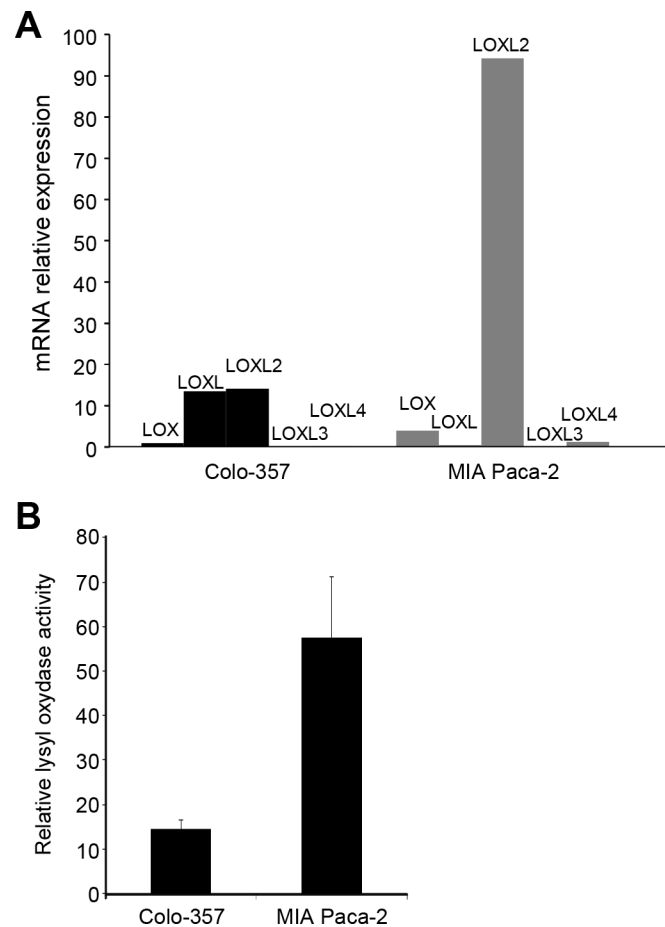

**Supplementary Figure S1: Expression and activity of LOX family members.** (A) RNAs were extracted from the indicated PDAC-derived cell lines and LOX, LOXL1, LOXL2, LOXL3, and LOXL4 transcript levels were assayed by qRT-PCR and normalized against HPRT1. (B) Supernatant of the indicated cell lines were removed and LOX family members activity measured.

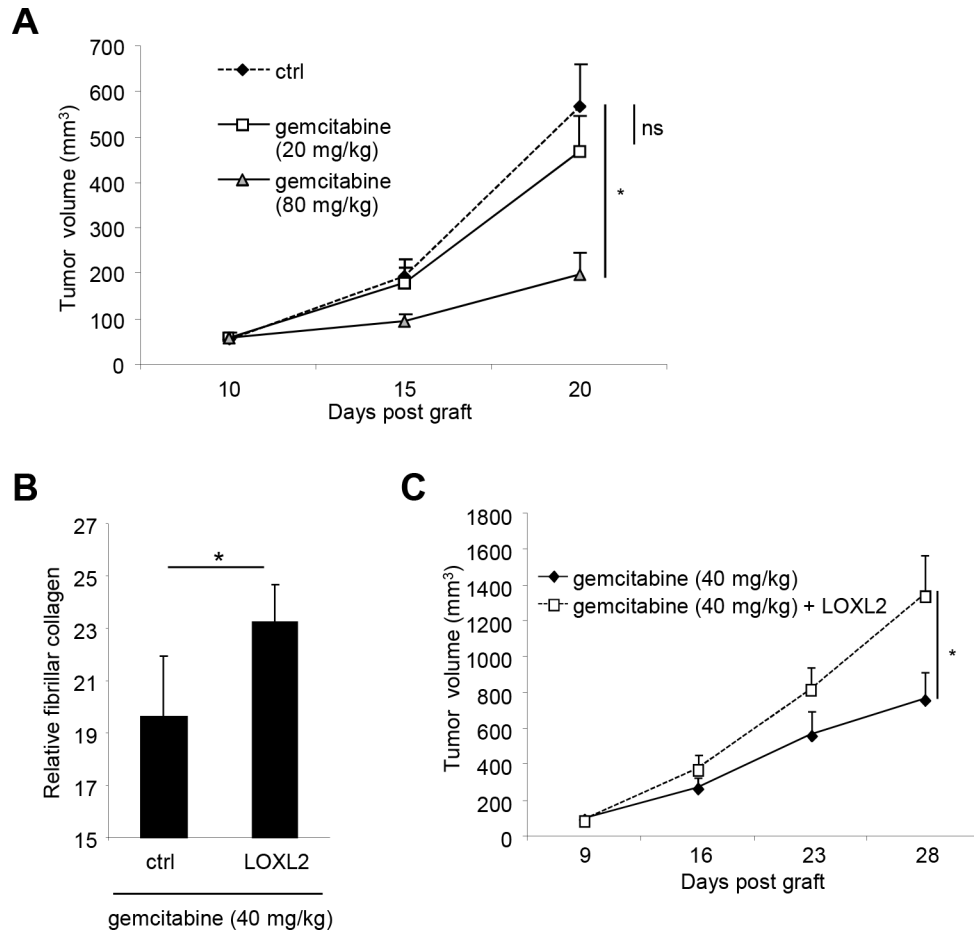

**Supplementary Figure S2: Response to gemcitabine treatment depends of lysyl oxidase level activity.** Five million Colo-357 pancreatic cancer cells per mouse were grafted into the right flanks of 6-week-old nude mice. The mice were subjected to the indicated treatment when the tumors reached a mean size of 50 mm<sup>3</sup> (A) or of 100 mm<sup>3</sup> (B–C). (A) Mice were intravenously injected every 3 days with the indicated dose of gemcitabine and tumor volumes were calculated ( $n = 12$  per group). Values are means  $\pm$  SEM. (B–C) Mice were treated every two days by IV injection of 40 mg/kg gemcitabine, alone or in combination with 10 ng recombinant LOXL2 injected directly into the tumor ( $n = 5$  per group). (B) Tissues were picosirius red stained and microscopically analyzed under polarized light to quantify cross-linked collagen. Relative levels of cross-linked collagen are presented as means  $\pm$  SEM. (C) Tumor volumes were calculated and means  $\pm$  SEM are presented. In each panel, values are means  $\pm$  SEM and the statistical test used was Mann-Whitney *U*.

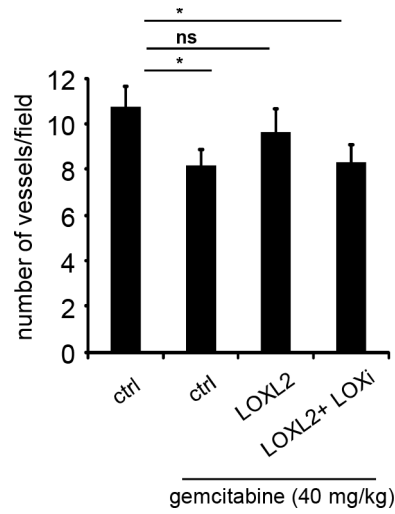

**Supplementary Figure S3: LOX family activity increases vessel number.** One million Colo-357/Luc pancreatic cancer cells per mouse were orthotopically grafted into 6-weekold nude mice. The mice were left untreated or received IV injections of 40 mg/kg gemcitabine, alone or with IP-injected LOXL2 or LOXL2 + LOXi, when the tumors reached a mean luminescence of 800 cts/s ( $n = 7$  per group). Sixty-three days after grafting, the tumors were processed for immunohistochemical CD31 staining. The mean number of vessels per field was calculated and statistical analysis was performed with the Mann-Whitney  $U$  test.

**Supplementary Table S1: Patients' characteristics**

| Variable                       | No. of Patients | %    |
|--------------------------------|-----------------|------|
| Gender                         |                 |      |
| Female                         | 147             | 47.6 |
| Male                           | 162             | 52.4 |
| Age, years                     |                 |      |
| Median                         | 62.3            |      |
| range                          | 37–87           |      |
| Mean                           | 63.2            |      |
| SD                             | 10.1            |      |
| Resection margins              |                 |      |
| R0                             | 239             | 77.3 |
| R1                             | 70              | 22.7 |
| Tumor Differentiation          |                 |      |
| Well                           |                 |      |
| Moderate                       | 135             | 43.7 |
| Poor                           | 121             | 39.2 |
| Unknown                        | 40              | 12.9 |
| Tumor Differentiation          |                 |      |
| Well/moderate                  | 256             | 82.8 |
| Poor                           | 40              | 17.2 |
| Tumor stage                    |                 |      |
| T1/T2                          | 57              | 18.4 |
| T3                             | 252             | 81.6 |
| Lymph Nodes                    |                 |      |
| Negative, N0                   | 78              | 25.2 |
| Positive, N1                   | 231             | 74.8 |
| Tumor Stage                    |                 |      |
| I                              | 7               | 2.3  |
| IB                             | 13              | 4.2  |
| IIA                            | 51              | 16.5 |
| IIB                            | 238             | 77.0 |
| Perineural invasion            |                 |      |
| Negative                       | 94              | 30.4 |
| Positive                       | 213             | 69.6 |
| Lymphovascular invasion        |                 |      |
| Negative                       | 125             | 40.5 |
| Positive                       | 184             | 59.5 |
| Adjuvant therapy               |                 |      |
| Yes                            | 212             | 70.6 |
| No                             | 91              | 29.4 |
| Type of adjuvant therapy       |                 |      |
| Gemcitabine-based chemotherapy | 181             | 85.4 |
| Other                          | 31              | 14.6 |

abbreviations: SD, standard deviation.

**Supplementary Table S2: Univariate analysis in the subgroup of patients who received an adjuvant “Gemcitabine-based chemotherapy”**

| Variable                                  | <i>n</i> = 181 |                    |                          | <i>n</i> = 174 |                     |                          |
|-------------------------------------------|----------------|--------------------|--------------------------|----------------|---------------------|--------------------------|
|                                           | No. events     | Median OS (months) | Log-Rank <i>p</i> -value | No. events     | Median DFS (months) | Log-Rank <i>p</i> -value |
| Gender                                    |                |                    |                          |                |                     |                          |
| Female                                    | 45/89          | 33.1               |                          | 53/86          | 15.5                |                          |
| Male                                      | 46/92          | 33.6               | 0.720                    | 63/89          | 14.7                | 0.611                    |
| Resection margins                         |                |                    |                          |                |                     |                          |
| R0                                        | 61/133         | 35.1               |                          | 79/130         | 16.8                |                          |
| R1                                        | 30/48          | 20.5               | < 0.001                  | 37/45          | 11.3                | < 0.001                  |
| Tumor Differentiation                     |                |                    |                          |                |                     |                          |
| Well                                      | 36/78          | 35.1               |                          | 46/77          | 18.6                |                          |
| Moderate                                  | 37/70          | 32.7               |                          | 47/68          | 14.3                |                          |
| Poor                                      | 14/27          | 22.9               | 0.241                    | 21/26          | 11.3                | 0.026                    |
| Tumor Differentiation                     |                |                    |                          |                |                     |                          |
| Well/moderate                             | 73/148         | 33.6               |                          | 93/145         | 16.6                |                          |
| Poor                                      | 14/27          | 22.9               | 0.182                    | 21/26          | 11.3                | 0.020                    |
| Tumor stage                               |                |                    |                          |                |                     |                          |
| T1/T2                                     | 16/25          | 33.6               |                          | 17/25          | 15.1                |                          |
| T3                                        | 75/156         | 33.3               | 0.642                    | 99/150         | 12.6                | 0.820                    |
| Lymph Nodes                               |                |                    |                          |                |                     |                          |
| Negative, N0                              | 17/37          | 35.1               |                          | 19/35          | 20.0                |                          |
| Positive, N1                              | 74/144         | 32.7               | 0.268                    | 97/140         | 14.5                | 0.049                    |
| Perineural invasion                       |                |                    |                          |                |                     |                          |
| Negative                                  | 28/61          | 34.3               |                          | 35/60          | 18.4                |                          |
| Positive                                  | 63/120         | 30.5               | 0.699                    | 81/115         | 14.5                | 0.103                    |
| Lymphovascular invasion                   |                |                    |                          |                |                     |                          |
| Negative                                  | 28/61          | 34.3               |                          | 26/43          | 17.9                |                          |
| Positive                                  | 63/120         | 31.8               | 0.160                    | 89/130         | 14.1                | 0.138                    |
| Level of fibrillary collagen P50 (median) |                |                    |                          |                |                     |                          |
| High (> P50)                              | 46/89          | 26.9               |                          | 56/84          | 12.8                |                          |
| Low (< P50)                               | 44/91          | 34.3               | 0.025                    | 59/90          | 16.9                | 0.035                    |
